# Supplementary material for: Thin film nanocomposite (TFN) hollow fiber membranes incorporated with functionalized acid-activated bentonite (ABn-NH) clay: towards enhancement of water vapor permeance and selectivity
Source: Royal Society of Chemistry journal article supplement (doi:10.1039/c7ta04945e), 2017-01-01
Supplement: c7ta04945e1.pdf [file c7ta04945e1.pdf]

***Supporting information***

**Thin film nanocomposite (TFN) hollow fiber membranes incorporated with functionalized acid-activated bentonite (ABn-NH) clay: Towards enhancement of water vapor permeance and selectivity**

Pravin G. Ingole,<sup>a</sup> Radheshyam R. Pawar,<sup>b</sup> Muhammad Irshad Baig,<sup>a</sup> Jae Deok Jeon,<sup>a</sup> and Hyung Keun Lee<sup>a</sup>

<sup>a</sup> Climate Change Research Division, Korea Institute of Energy Research, 71-2 Jang-dong, Yuseong-gu, Daejeon, South Korea.

<sup>b</sup> Department of Energy and Environment Convergence Technology, Catholic Kwandong University, 522 Naegok-dong, Gangneung 210-701, South Korea

\*Corresponding author: Tel.: +82-42-860-3647; Fax: +82-42-860-3134

Email addresses: [ingolepravin@gmail.com](mailto:ingolepravin@gmail.com) (P. G. Ingole); [hklee@kier.re.kr](mailto:hklee@kier.re.kr) (H. K. Lee)

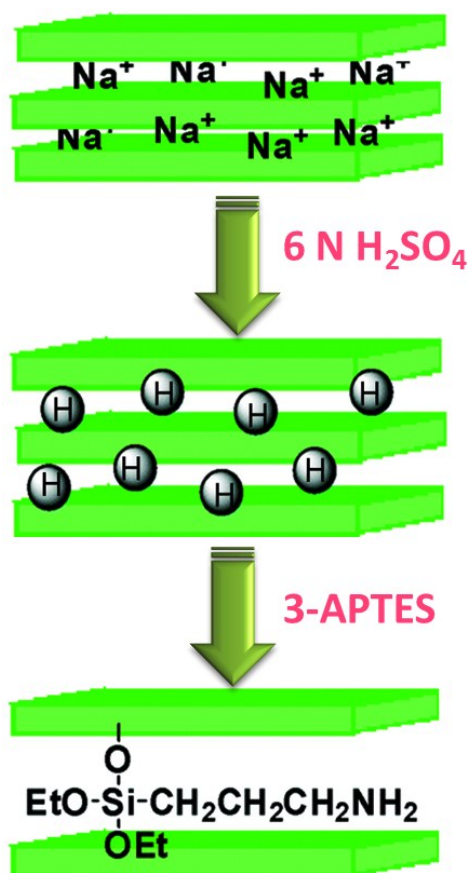

**Fig. S1** 3-aminopropyltriethoxysilane (3-APTES) functionalization of acid activated bentonite

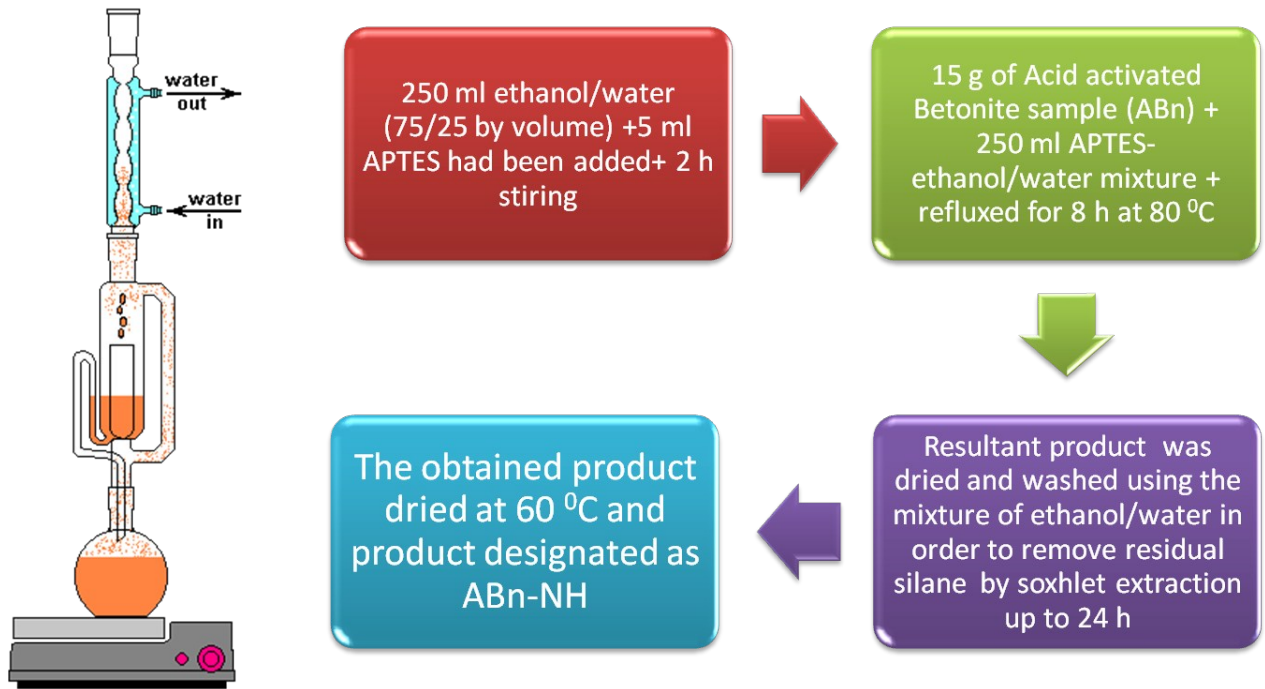

**Fig. S2:** Schematic representation of synthesis procedure of functionalization of acid activated bentonite.

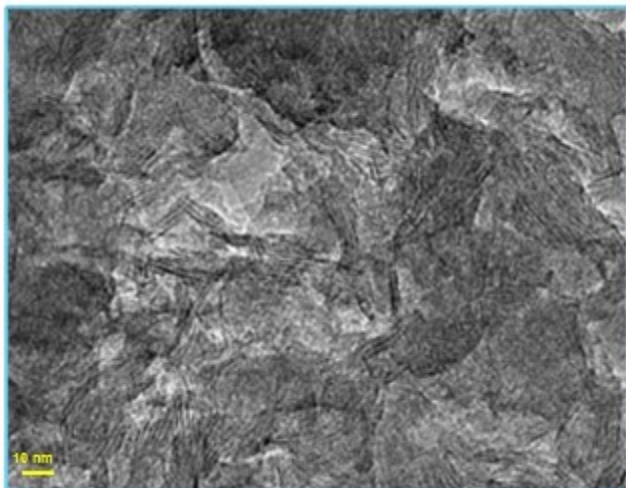

**Fig. S3:** TEM image of synthetic amino functionalized acid-activated bentonite.

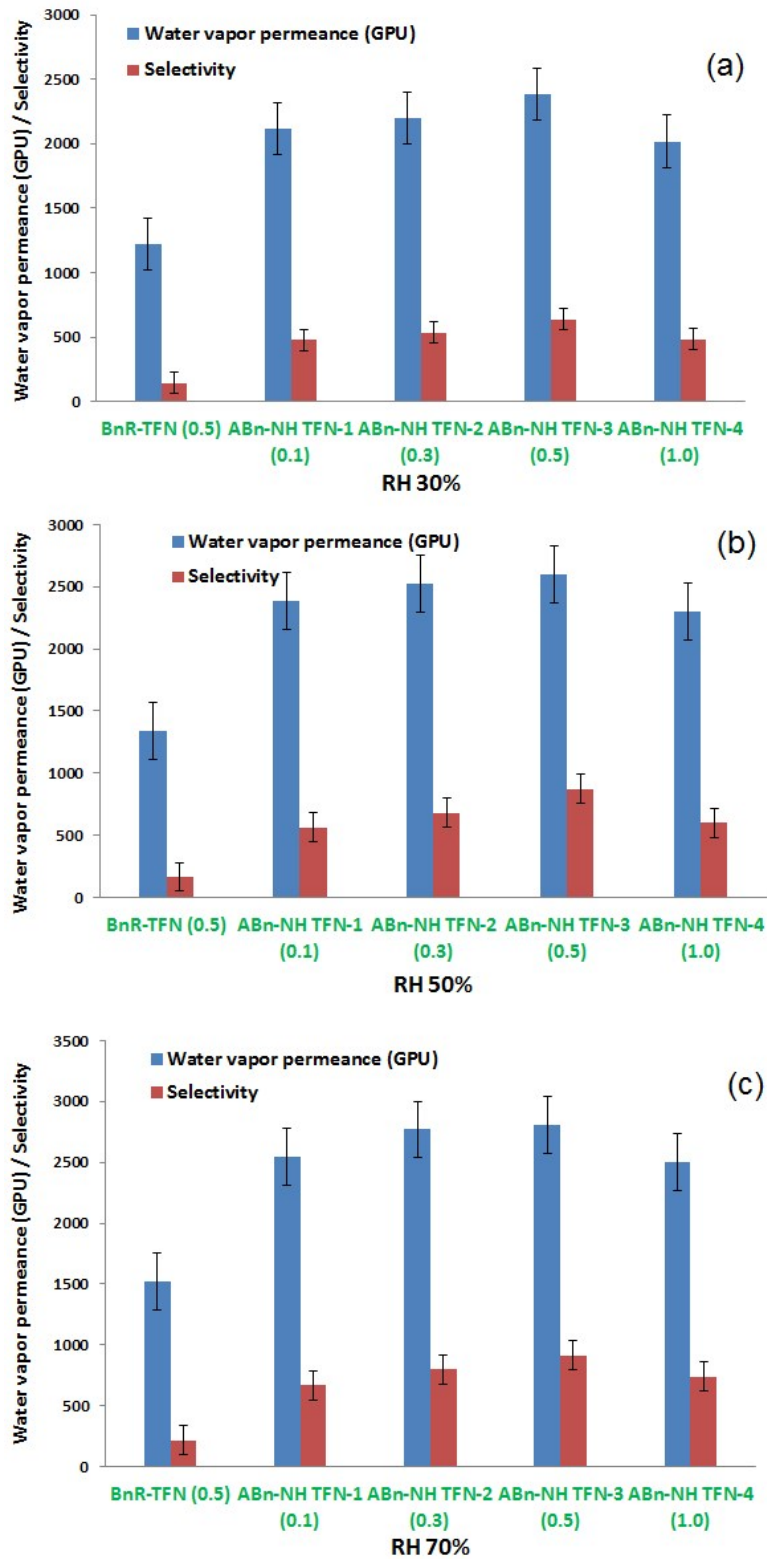

**Fig. S4:** Effect of relative humidity on the water vapor/ $N_2$  mixture gas separation performance of the TFN membranes (a) relative humidity 30%, (b) relative humidity 50%, and (c) relative humidity 70%.
